# Supplementary material for: Choline-Amino Acid Ionic Liquids as Green Functional Excipients to Enhance Drug Solubility
Source: PubMed Central journal article supplement (PMC6321021; doi:10.3390/pharmaceutics10040288), 2018-12-19
Supplement: pharmaceutics-10-00288-s001.pdf [file pharmaceutics-10-00288-s001.pdf]

# Supplementary Materials: Choline-Amino Acid Ionic Liquids as Green Functional Excipients to Enhance Drug Solubility

Rita Caparica, Ana Júlio, André Rolim Baby, Maria Eduarda Machado Araújo, Ana Sofia Fernandes, João Guilherme Costa and Tânia Santos de Almeida

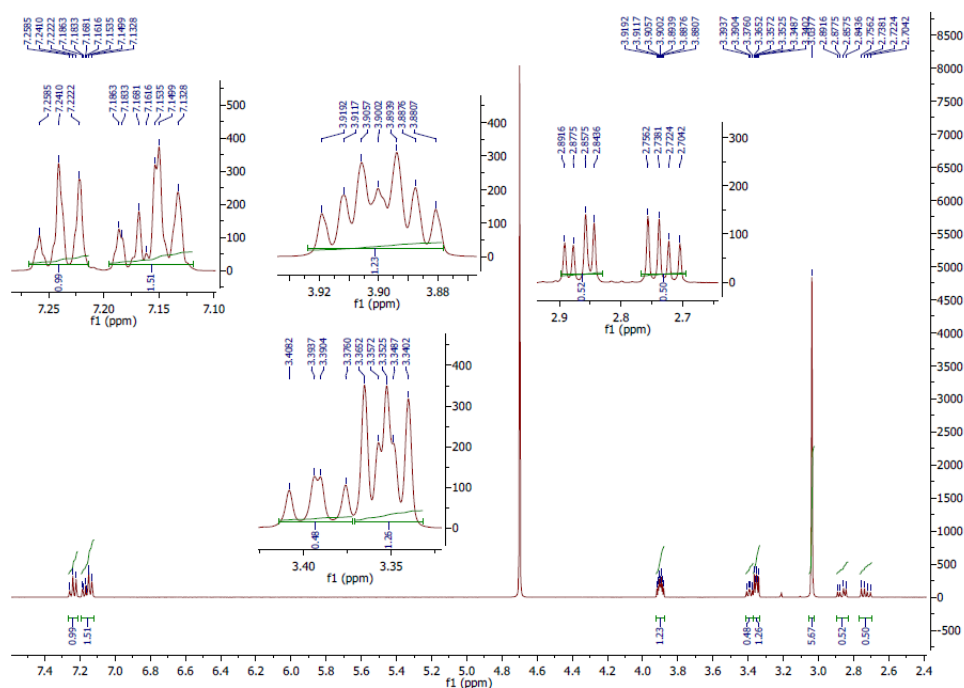

a).  $^1\text{H NMR}$  ( $\text{D}_2\text{O}$ ) ( $\delta$  ppm, mult,  $J_{\text{H-H}/\text{Hz}}$ ) [Cho][Phe]: 3.04 (s,  $\text{CH}_3$ , N- $\text{CH}_3$ ), 3.35 (t, 5.1,  $\text{CH}_2$ , H-2), 3.90 (m,  $\text{CH}_2$ , H-3), 3.39 (dd,  $J_1=5.8$ ,  $J_2=4.76$ , CH, H-2'), 2.87 (dd,  $J_1=5.64$ ,  $J_2=5.56$ ,  $\text{CH}_2$ , H-3'), 2.73 (dd,  $J_1=7.24$ ,  $J_2=7.28$ ,  $\text{CH}_2$ , H-4'), 7.16 (m,  $\text{CH}_{\text{aromatic ring}}$ , H-2'',3'',5'',6''), 7.24 (t, 7.5,  $\text{CH}_{\text{aromatic ring}}$ , H-4').

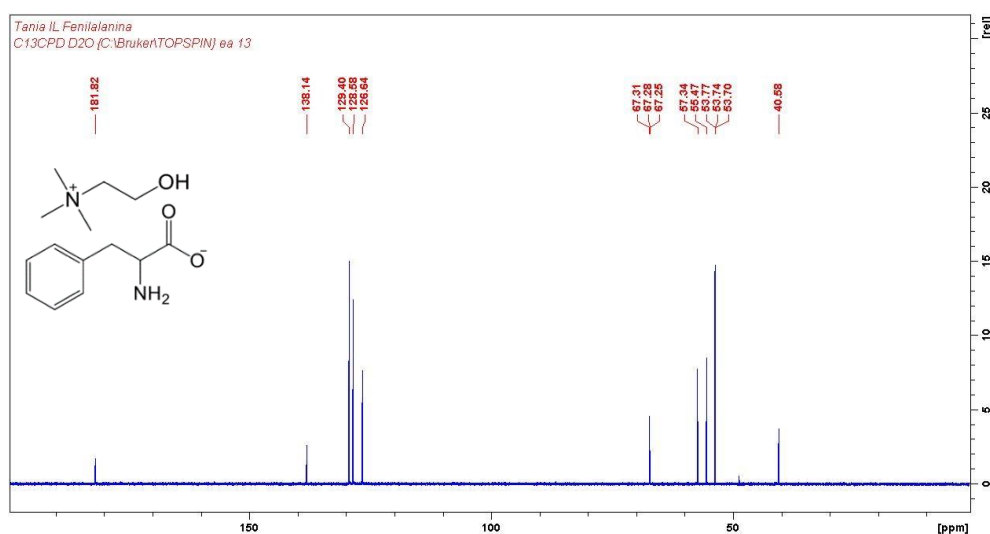

b).  $^{13}\text{C NMR}$  ( $\text{D}_2\text{O}$ ) [Cho] [Phe] ( $\delta$  ppm): 181,8 ( $\text{COO}^-$ ,  $\text{C}_1'$ ), 138,14 (C,  $\text{C}_1''$ ), 129,40 ( $\text{CH}$ ,  $\text{C}_2''$ ,  $\text{C}_6''$ ), 128,58 ( $\text{CH}$ ,  $\text{C}_3''$ ,  $\text{C}_5''$ ), 126,64 ( $\text{CH}$ ,  $\text{C}_4''$ ), 67,28 ( $\text{CH}_2$ ,  $\text{C}_2$ ), 57,34 ( $\text{CH}$ ,  $\text{C}_2'$ ), 55,47 ( $\text{CH}_2$ ,  $\text{C}_3$ ), 53,77, 53,74, 53,70 ( $\text{CH}_3$ ,  $\text{C}_1$ ), 40,58 ( $\text{CH}_2$ ,  $\text{C}_3'$ ).

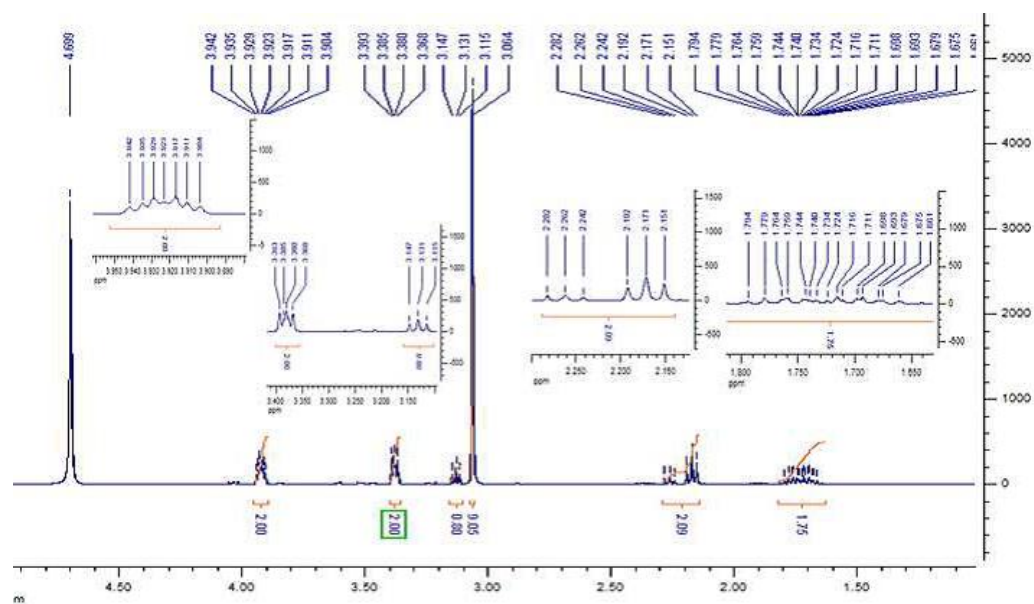

c).  $^1\text{H-NMR}$  ( $\text{D}_2\text{O}$ )[Cho][Glu] ( $\delta$  ppm, mult,  $J_{\text{H-H}/\text{Hz}}$ ): 3.04 (s,  $\text{CH}_3, \text{N-CH}_3$ ), 3.38 (m,  $\text{CH}_2, \text{H-2}$ ), 3.92 (m,  $\text{CH}_2, \text{H-3}$ ), 3.13 (t, 6.3,  $\text{CH}, \text{H-2}'$ ), 1.73 (m,  $\text{CH}_2, \text{H-3}'$ ), 2.17, 2.26 (dt,  $J=8.17, \text{CH}_2, \text{H-4}'$ ).

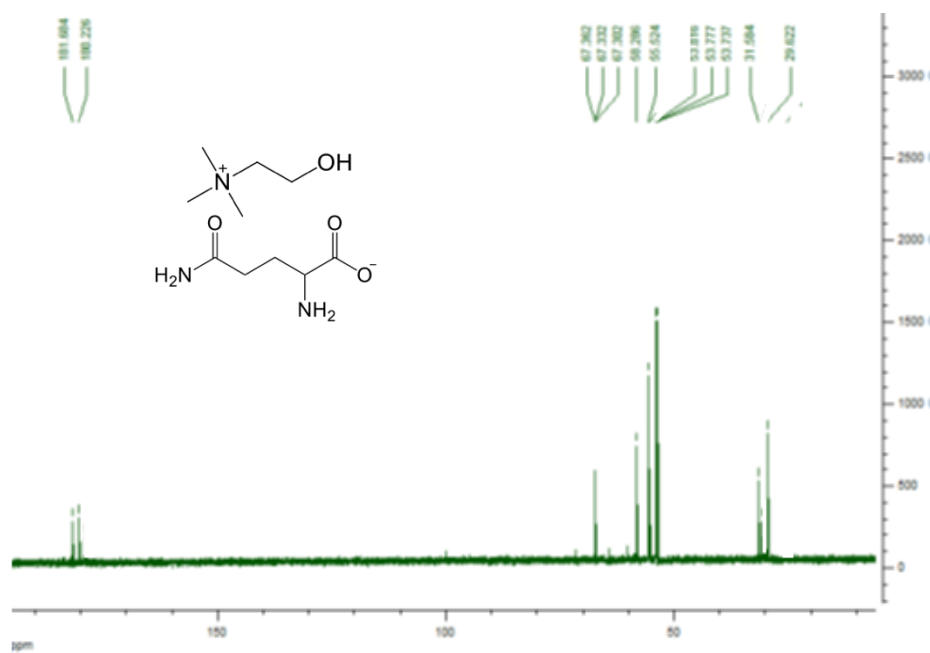

d).  $^{13}\text{C-NMR}$  ( $\text{D}_2\text{O}$ ) [Cho][Glu] ( $\delta$  ppm): 181.6 ( $\text{CONH}_2, \text{C5}'$ ), 180.2 ( $\text{COO}^-, \text{C1}'$ ), 67.33 ( $\text{CH}_2, \text{C2}$ ), 58.29 ( $\text{CH}, \text{C2}'$ ), 55.52 ( $\text{CH}_2, \text{C3}$ ), 53.82, 53.78, 53.74 ( $\text{CH}_3, \text{C1}$ ), 31.58 ( $\text{CH}_2, \text{C3}'$ ), 29.62 ( $\text{CH}_2, \text{C4}'$ ).

**Figure S1:** NMR data and structure of the choline-based ionic liquids: **a)**  $^1\text{H-NMR}$  of [Cho][Phe]; **b)**  $^{13}\text{C-NMR}$  of [Cho][Phe]; **c)**  $^1\text{H-NMR}$  of [Cho][Glu]; **d)**  $^{13}\text{C-NMR}$  of [Cho][Glu].
